Vecf, or ideally but less practically plasma volume, should become part of an anaemia management protocol.

*Conflict of interest statement.* D.R. and C.H.J. have received sponsorship to attend national and international meetings from the manufacturers of all EPO brands. D.R. has acted as medical adviser to the manufacturers of all EPO brands.

Renal Unit  
York Hospital  
York  
UK

Email: colinjones@doctors.org.uk

Colin H. Jones  
Lucy Martin  
Lynn Ridley  
Donald Richardson

1. Jones CH, Akbani H, Croft DC, Worth DP. The relationship between serum albumin and hydration status in hemodialysis patients. *J Renal Nutr* 2002; 12: 209–212
2. Jones CH, Newstead CG, Will EJ, Smye SW, Davison AM. Assessment of nutritional status in CAPD patients: serum albumin is not a useful measure. *Nephrol Dial Transplant* 1997; 12: 1406–1413
3. Jacobs C, Horl WH, Macdougall IC *et al.* European best practice guidelines 5: target haemoglobin. *Nephrol Dial Transplant* 2000; 15 [Suppl 4]: 15–19
4. Will EJ, Cameron JS. European guidelines for renal anaemia-predicting 85% compliance. *Nephrol Dial Transplant* 2000; 15: 439–440

DOI: 10.1093/ndt/gfh072

### Hypothyroidism and resistance to human recombinant erythropoietin

Sir,

Many possible causes of resistance to human recombinant erythropoietin (rh-EPO) have been reported in patients with renal failure [1]. However, some factors remain controversial. We report a haemodialysis patient with a diminished response to rh-EPO in association with hypothyroidism.

The patient was a 62-year-old female who was treated with regular haemodialysis since 1993. She had a past medical history of primary hypertension and pulmonary tuberculosis. During 5 years, haemoglobin level ranged between 10.2

and 11.7 g/dl with rh-EPO alpha treatment of 9000 IU/week. In 1998, the patient developed secondary hyperparathyroidism (iPTH 1845 pg/ml) and worsened anaemia (Hb 9 g/dl) despite increasing doses of rh-EPO up to 15 000 IU/week. Successful subtotal parathyroidectomy was performed in October 1998 together with subtotal thyroidectomy because of nodular goiter. Haemoglobin level remained unchanged with normochromic, normocytic erythrocytes and normal leukocytes and platelets. All usual causes of epoetin resistance were ruled out, such as infection, malignancy, iron or vitamin deficiency states, aluminum overload and underdialysis. A few months later, hypercholesterolaemia appeared and subclinical hypothyroidism was diagnosed. Thyroid-stimulating hormone was >50 mIU/l, free triiodothyronine 4.4 pmol/l and free thyroxine 9 pmol/l. Thyroxine replacement therapy was started in April 1999 and the dose was progressively increased to 225 µg/day. Normalization of serum thyroid hormone levels was accompanied by improved response to epoetin (Figure 1). Haemoglobin level increased to 11.5 g/dl with a parallel reduction of rh-EPO dose to 6000 IU/week.

These findings, as in two previous reports [2,3], strongly support the hypothesis that hypothyroidism may contribute to epoetin resistance in chronic haemodialysis patients.

*Conflict of interest statement.* None declared.

<sup>1</sup>Service de Néphrologie and  
Inserm U507  
Hôpital Necker  
Paris

<sup>2</sup>Centre Henri Kuntziger  
AURA  
Paris  
France

Email: malikpablo@wanadoo.fr

Malik Touam<sup>1</sup>  
Bruno Guéry<sup>1</sup>  
Christophe Goupy<sup>1</sup>  
Victorio Menoyo<sup>2</sup>  
Tilman Drüeke<sup>1</sup>

1. Richardson D. Clinical factors influencing sensitivity and response to epoetin. *Nephrol Dial Transplant* 2002; 17 [Suppl 1]: 53–59
2. Dilek M, Akpolat T, Cengiz K. Hypothyroidism as a cause of resistance to erythropoietin. *Nephron* 2002; 92: 248
3. Sungur C, Erbas T, Akpolat T *et al.* Resistance to human recombinant erythropoietin in hypothyroidism. *Acta Haematol* 1992; 88: 162

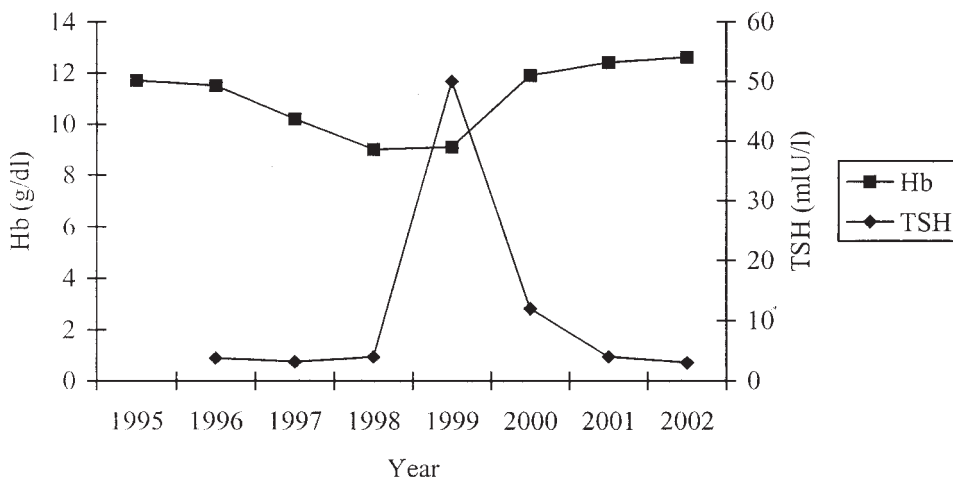

Fig. 1. Evolution of haemoglobin level and thyroid stimulating hormone.

DOI: 10.1093/ndt/gfg556

### The use of androgens in anaemia resistant to erythropoietin and i.v. iron in patients with heart and renal failure

Sir,

We read with interest the recent thorough review of use of androgen therapy in the management of renal anaemia [1]. We have been interested in the role of erythropoietin and i.v. iron in the correction of the anaemia seen in patients with congestive heart failure (CHF) [2–6]. Most of these patients also have chronic kidney insufficiency (CKI). In 223 such cases, we attempted to correct their anaemia with the combination of up to 10 000 IU erythropoietin (EPO) given subcutaneously once weekly, and i.v. Venofer (ferric sucrose) given once weekly. We gave the Venofer until either the haemoglobin (Hb) reached target, the per cent transferrin saturation reached 35% or the serum ferritin reached 700 µg/l, whichever came first. We encountered 19 cases (8.5%) (mean age  $74.0 \pm 6.9$  years) (14 males/five females) that failed to reach a target Hb of 13 g/dl over at least 4 months of this treatment, the Hb increasing from a mean of  $10.1 \pm 1.2$  to  $11.1 \pm 0.8$  g/dl. In these 19 cases we administered nandrolone decanoate (ND) 200 mg (one ampoule) once weekly i.m. while continuing the EPO–Fe combination until the target Hb was reached. One male patient developed a skin rash within 24 h after the first dose and was removed from the study. In the remaining 18 cases the mean Hb increased over the next 3 months from  $11.1 \pm 0.8$  to  $13.3 \pm 0.8$  g/dl ( $P < 0.01$ ). All the patients reached the target Hb by 3 months after ND treatment was started. None of the 18 patients, male or female, complained of any side effects and most noted an increase in appetite. There were no significant changes in serum cholesterol, HDL, LDL, triglycerides, liver function tests or blood pressure. Subsequently the patients no longer required further ND and were maintained on EPO and i.v. Fe as needed. We agree with Navarro that in patients with anaemia and CKI who do not reach target Hb with large doses of EPO and i.v. Fe the short-term addition of ND may rapidly correct the anaemia with minimal side effects. ND seems to be a useful adjuvant in patients receiving EPO for the correction of the anaemia of renal and heart failure who are resistant to therapy.

*Conflict of interest statement.* None declared.

<sup>1</sup>Tel Aviv Sourasky Medical Center      Donald Silverberg<sup>1</sup>  
 Department of Nephrology              Dov Wexler<sup>2</sup>  
 Tel Aviv                                          Miriam Blum<sup>1</sup>  
<sup>2</sup>Tel Aviv Sorasky Medical Center      Doron Schwartz<sup>1</sup>  
 Department of Cardiology              Adrian Iaina<sup>1</sup>  
 Tel Aviv  
 Israel  
 Email: donald@netvision.net.il

1. Navarro JF. In the erythropoietin era, can we forget alternative or adjunctive therapies for renal anaemia management? The androgen example. *Nephrol Dial Transplant* 2003; 18: 2222–2226
2. Silverberg DS, Wexler D, Blum M, Schwartz D, Wollman Y, Iaina A. Erythropoietin should be part of the management of congestive heart failure management. *Kidney Int* 2003; 64 [Suppl 87]: S40–S47
3. Silverberg DS, Wexler D, Blum M, Iaina A. The Cardio Renal Anemia Syndrome: correcting anemia in patients with resistant

congestive heart failure can improve both cardiac and renal function and reduce hospitalizations. *Clin Nephrol* 2003; 60 [Suppl 1]: S93–S102

4. Silverberg DS, Wexler D, Blum M *et al.* The effect of correction of anaemia in diabetic and non diabetics with severe resistant congestive heart failure and chronic renal failure by subcutaneous erythropoietin and intravenous iron. *Nephrol Dial Transplant* 2003; 18: 141–146
5. Silverberg DS, Wexler D, Blum M *et al.* The use of subcutaneous erythropoietin and intravenous iron for the treatment of the anemia of severe, resistant congestive heart failure improves cardiac and renal function, functional cardiac class, and markedly reduces hospitalizations. *J Am Coll Cardiol* 2000; 35: 1737–1744
6. Silverberg DS, Wexler D, Sheps D *et al.* The effect of correction of mild anemia in severe resistant heart failure using subcutaneous erythropoietin and intravenous iron: a randomized controlled study. *J Am Coll Cardiol* 2001; 37: 1775–1780

DOI: 10.1093/ndt/gfh006

### Severe anaphylactic reaction in a haemodialysis patient after administration of reviparin

Sir,

Low-molecular weight heparins (LMWHs) are widely used during haemodialysis. We recently observed a patient who developed a severe allergic reaction after administration of an LMWH (reviparin). The patient, a 52-year-old women suffering from end-stage renal disease caused by diabetic nephropathy, started haemodialysis in March 2003. She had a past history of hepatitis C with a severe anaphylactic reaction after administration of interferon- $\alpha$ . From the first haemodialysis session, she experienced serious respiratory problems which required treatment with aminophylline and oxygen. Dyspnoea, cough and wheezing occurred during the dialysis sessions, and she recovered completely after the attacks. Bicarbonate dialysis, 4 h per session, three times per week, with polysulfone dialysers (Fresenius<sup>®</sup>) was performed, with no re-use of dialyser. From March to May, reviparin was used as anticoagulant therapy. The patient had never used angiotensin-converting enzyme (ACE) inhibitors. The patient was switched to another polysulfone dialyser brand (Gambro<sup>®</sup>) after 1 month, but with no improvement in respiratory status. IgE was 588 kIU/l (normal range up to 114 kIU/l). There was no eosinophilia in the peripheral blood. In May 2003, nasal bleeding caused by hypertension occurred requiring posterior nasal tamponade. Her platelets were within the normal range, as were her coagulation parameters. She was then dialysed without reviparin and her overall status significantly improved. She had no respiratory problems. In July 2003, 45 days after the last episode of severe nasal bleeding, reviparin was introduced as anticoagulant therapy. Respiratory distress recurred, this time followed by bullous skin changes on the lower extremities. All symptoms disappeared after discontinuation of reviparin.

After searching the WHO databases and Medline, to the best of our knowledge, this is the first case of a haemodialysis patient who developed an anaphylactic reaction after administration of reviparin. Ueda *et al.* described an anaphylactoid reaction induced by dalteparin sodium in a haemodialysis patient [1]. We would like to warn colleagues that anticoagulation with LMWH in haemodialysis patients with a known allergic predisposition can cause serious anaphylactic reactions.
